# Supplementary material for: Corals-inspired magnetic absorbents for fast and efficient removal of microplastics in various water sources
Source: Royal Society of Chemistry journal article supplement (doi:10.1039/d4ra02521k), 2024-01-01
Supplement: d4ra02521k1.pdf [file d4ra02521k1.pdf]

## Supplementary Materials

### Corals-inspired magnetic absorbents for fast and efficient removal of microplastics in various water sources

Yunyan Li, Huilan Chen, Shuai Li, Luping Feng, Ziyi Wang, Di Wang, Qidong Wang, and Hua Wang\*

Huzhou Key Laboratory of Medical and Environmental Application Technologies, School of Life Sciences, Huzhou University, Zhejiang 313000, P.R. China.

\* Corresponding Author: E-mail address: wanghua@zjhu.edu.cn; Web: <http://wang.qfnu.edu.cn>.

#### Experimental Section

An aliquot of Fe<sub>3</sub>O<sub>4</sub>@PDA (20 mg L<sup>-1</sup>) was separately introduced into the solutions of different water sources containing fluorescent MPs of different concentrations, which were stirred at 300 rpm for 20 min at room temperature by using a constant temperature shaker. After the magnetic separation and standing for 20 min, a certain volume (i.e., 200 μL) of the mixtures at 2 cm below the liquid level was taken out by using a pipette gun, of which the fluorescence intensities were measured with a fluorescence spectrophotometer (F-7100, Hitachi High-Technologies Corporation, Japan) at the excitation wavelength of 455 nm and slit width of 10 nm. Moreover, each of the MPs samples from different water sources was prepared separately by mixing five samples that were fetched in different time and/or locations. Accordingly, the removal efficiencies (RE<sub>X</sub>) of Fe<sub>3</sub>O<sub>4</sub>@PDA for MPs were calculated by using the following equation:

$$\Delta F_X = F_0 - F_x \quad (1)$$

$$RE_X = \frac{\Delta F_X}{F_0} \times 100\% \quad (2)$$

Herein,  $F_0$  and  $F_e$  are the fluorescence intensities of MPs in the solutions before and after the removal operations, respectively, where  $\Delta F_X$  refer to the differences between their fluorescence intensities.

The raw data for Figure 6 are provided below.

1. Pure water samples

| <b>MPs concentrations</b> | <b>F<sub>0</sub></b> | <b>F<sub>X</sub></b> | <b>ΔF<sub>X</sub></b> | <b>RE<sub>X</sub> (%)</b> | <b>Average RE (%)</b> | <b>STDEV</b> |
|---------------------------|----------------------|----------------------|-----------------------|---------------------------|-----------------------|--------------|
| 1.0 mg L <sup>-1</sup>    | 1659.71              | 412.53               | 1247.18               | 75.14                     | 74.42                 | 0.007708     |
|                           | 1646.23              | 434.46               | 1211.77               | 73.61                     |                       |              |
|                           | 1661.83              | 423.87               | 1237.96               | 74.49                     |                       |              |
| 2.0 mg L <sup>-1</sup>    | 2943.87              | 356.29               | 2587.58               | 87.90                     | 88.79                 | 0.008773     |
|                           | 2929.56              | 327.81               | 2601.75               | 88.81                     |                       |              |
|                           | 2931.12              | 303.33               | 2627.79               | 89.65                     |                       |              |
| 4.0 mg L <sup>-1</sup>    | 5474.98              | 55.76                | 5419.22               | 98.98                     | 98.32                 | 0.006261     |
|                           | 5401.99              | 122.33               | 5279.66               | 97.74                     |                       |              |
|                           | 5468.35              | 95.61                | 5372.74               | 98.25                     |                       |              |
| 6.0 mg L <sup>-1</sup>    | 7851.56              | 71.45                | 7780.11               | 99.09                     | 98.58                 | 0.005285     |
|                           | 7842.29              | 108.43               | 7733.86               | 98.62                     |                       |              |
|                           | 7813.64              | 153.54               | 7660.10               | 98.03                     |                       |              |
| 8.0 mg L <sup>-1</sup>    | 9592.56              | 63.89                | 9528.67               | 99.33                     | 98.73                 | 0.006473     |
|                           | 9581.92              | 115.08               | 9466.84               | 98.80                     |                       |              |
|                           | 9546.48              | 186.58               | 9359.90               | 98.05                     |                       |              |

2. Suburban streams samples

| <b>MPs concentrations</b> | <b>F<sub>0</sub></b> | <b>F<sub>X</sub></b> | <b>ΔF<sub>X</sub></b> | <b>RE<sub>X</sub> (%)</b> | <b>Average RE (%)</b> | <b>STDEV</b> |
|---------------------------|----------------------|----------------------|-----------------------|---------------------------|-----------------------|--------------|
| 1.0 mg L <sup>-1</sup>    | 1883.43              | 555.61               | 1327.82               | 70.50                     | 70.91                 | 0.010764     |
|                           | 1838.93              | 549.84               | 1289.09               | 70.10                     |                       |              |
|                           | 1801.35              | 502.00               | 1299.35               | 72.13                     |                       |              |
| 2.0 mg L <sup>-1</sup>    | 3210.87              | 529.15               | 2681.72               | 83.52                     | 84.53                 | 0.013098     |
|                           | 3284.73              | 523.59               | 2761.14               | 84.06                     |                       |              |
|                           | 3259.06              | 455.94               | 2803.12               | 86.01                     |                       |              |
| 4.0 mg L <sup>-1</sup>    | 5464.27              | 309.28               | 5154.99               | 94.34                     | 94.71                 | 0.010835     |
|                           | 5442.53              | 221.51               | 5221.02               | 95.93                     |                       |              |
|                           | 5431.89              | 333.52               | 5098.37               | 93.86                     |                       |              |
| 6.0 mg L <sup>-1</sup>    | 7912.98              | 394.86               | 7518.12               | 95.01                     | 95.54                 | 0.009354     |
|                           | 7958.65              | 269.00               | 7689.65               | 96.62                     |                       |              |
|                           | 7943.65              | 397.98               | 7545.67               | 94.99                     |                       |              |
| 8.0 mg L <sup>-1</sup>    | 9613.98              | 285.54               | 9328.44               | 97.03                     | 96.35                 | 0.009694     |
|                           | 9599.33              | 309.10               | 9290.23               | 96.78                     |                       |              |
|                           | 9641.42              | 458.93               | 9182.49               | 95.24                     |                       |              |

### 3. Village rivers samples

| <b>MPs concentrations</b> | <b>F<sub>0</sub></b> | <b>F<sub>X</sub></b> | <b>ΔF<sub>X</sub></b> | <b>RE<sub>X</sub> (%)</b> | <b>Average RE (%)</b> | <b>STDEV</b> |
|---------------------------|----------------------|----------------------|-----------------------|---------------------------|-----------------------|--------------|
| 1.0 mg L <sup>-1</sup>    | 1798.12              | 491.97               | 1306.15               | 72.64                     | 71.63                 | 0.009478     |
|                           | 1790.76              | 523.62               | 1267.14               | 70.76                     |                       |              |
|                           | 1754.85              | 500.31               | 1254.54               | 71.49                     |                       |              |
| 2.0 mg L <sup>-1</sup>    | 3014.56              | 472.68               | 2541.88               | 84.32                     | 83.55                 | 0.014212     |
|                           | 3091.38              | 559.23               | 2532.15               | 81.91                     |                       |              |
|                           | 3054.66              | 475.92               | 2578.74               | 84.42                     |                       |              |
| 4.0 mg L <sup>-1</sup>    | 5342.66              | 298.12               | 5044.54               | 94.42                     | 94.21                 | 0.009035     |
|                           | 5391.03              | 270.09               | 5120.94               | 94.99                     |                       |              |
|                           | 5358.82              | 363.33               | 4995.49               | 93.22                     |                       |              |
| 6.0 mg L <sup>-1</sup>    | 8012.32              | 324.50               | 7687.82               | 95.95                     | 94.83                 | 0.009744     |
|                           | 8019.98              | 455.53               | 7564.45               | 94.32                     |                       |              |
|                           | 8036.55              | 465.32               | 7571.23               | 94.21                     |                       |              |
| 8.0 mg L <sup>-1</sup>    | 9780.21              | 535.96               | 9244.25               | 94.52                     | 94.18                 | 0.009469     |
|                           | 9700.54              | 493.76               | 9206.78               | 94.91                     |                       |              |
|                           | 9776.54              | 673.60               | 9102.94               | 93.11                     |                       |              |

### 4. Lake water samples

| <b>MPs concentrations</b> | <b>F<sub>0</sub></b> | <b>F<sub>X</sub></b> | <b>ΔF<sub>X</sub></b> | <b>RE<sub>X</sub> (%)</b> | <b>Average RE (%)</b> | <b>STDEV</b> |
|---------------------------|----------------------|----------------------|-----------------------|---------------------------|-----------------------|--------------|
| 1.0 mg L <sup>-1</sup>    | 1709.98              | 560.70               | 1149.28               | 67.21                     | 67.68                 | 0.011682     |
|                           | 1683.24              | 558.50               | 1124.74               | 66.82                     |                       |              |
|                           | 1697.55              | 526.07               | 1171.48               | 69.01                     |                       |              |
| 2.0 mg L <sup>-1</sup>    | 2803.54              | 509.40               | 2294.14               | 81.83                     | 81.53                 | 0.023039     |
|                           | 2843.19              | 561.81               | 2281.38               | 80.24                     |                       |              |
|                           | 2838.96              | 495.97               | 2342.99               | 82.53                     |                       |              |
| 4.0 mg L <sup>-1</sup>    | 5298.34              | 474.73               | 4823.61               | 91.04                     | 91.67                 | 0.011935     |
|                           | 5283.75              | 367.22               | 4916.53               | 93.05                     |                       |              |
|                           | 5289.99              | 479.80               | 4810.19               | 90.93                     |                       |              |
| 6.0 mg L <sup>-1</sup>    | 7823.98              | 680.69               | 7143.29               | 91.30                     | 91.54                 | 0.008709     |
|                           | 7849.88              | 720.62               | 7129.26               | 90.82                     |                       |              |
|                           | 7820.02              | 585.72               | 7234.30               | 92.51                     |                       |              |
| 8.0 mg L <sup>-1</sup>    | 9453.02              | 818.63               | 8634.39               | 91.34                     | 92.11                 | 0.008069     |
|                           | 9451.23              | 751.37               | 8699.86               | 92.05                     |                       |              |
|                           | 9467.43              | 667.45               | 8799.98               | 92.95                     |                       |              |

### 5. Aquaculture water samples

| <b>MPs concentrations</b> | <b>F<sub>0</sub></b> | <b>F<sub>X</sub></b> | <b>ΔF<sub>X</sub></b> | <b>RE<sub>X</sub> (%)</b> | <b>Average RE (%)</b> | <b>STDEV</b> |
|---------------------------|----------------------|----------------------|-----------------------|---------------------------|-----------------------|--------------|
| 1.0 mg L <sup>-1</sup>    | 1599.01              | 568.93               | 1030.08               | 64.42                     | 64.75                 | 0.009491     |
|                           | 1566.28              | 535.35               | 1030.93               | 65.82                     |                       |              |
|                           | 1587.36              | 571.29               | 1016.07               | 64.01                     |                       |              |
| 2.0 mg L <sup>-1</sup>    | 3024.56              | 564.38               | 2460.18               | 81.34                     | 81.41                 | 0.014614     |
|                           | 3036.90              | 519.01               | 2517.89               | 82.91                     |                       |              |
|                           | 3001.82              | 600.66               | 2401.16               | 79.99                     |                       |              |
| 4.0 mg L <sup>-1</sup>    | 5411.76              | 539.01               | 4872.75               | 90.04                     | 91.28                 | 0.010739     |
|                           | 5405.87              | 438.42               | 4967.45               | 91.89                     |                       |              |
|                           | 5441.42              | 440.21               | 5001.21               | 91.91                     |                       |              |
| 6.0 mg L <sup>-1</sup>    | 8096.53              | 604.81               | 7491.72               | 92.53                     | 90.90                 | 0.014205     |
|                           | 8089.49              | 791.96               | 7297.53               | 90.21                     |                       |              |
|                           | 8099.64              | 814.01               | 7285.63               | 89.95                     |                       |              |
| 8.0 mg L <sup>-1</sup>    | 9400.95              | 928.81               | 8472.14               | 90.12                     | 90.38                 | 0.011424     |
|                           | 9429.76              | 789.27               | 8640.49               | 91.63                     |                       |              |
|                           | 9415.65              | 999.00               | 8416.65               | 89.39                     |                       |              |

### 6. Inner-city moats samples

| <b>MPs concentrations</b> | <b>F<sub>0</sub></b> | <b>F<sub>X</sub></b> | <b>ΔF<sub>X</sub></b> | <b>RE<sub>X</sub> (%)</b> | <b>Average RE (%)</b> | <b>STDEV</b> |
|---------------------------|----------------------|----------------------|-----------------------|---------------------------|-----------------------|--------------|
| 1.0 mg L <sup>-1</sup>    | 1756.98              | 722.12               | 1034.86               | 58.90                     | 59.57                 | 0.014008     |
|                           | 1760.31              | 683.35               | 1076.96               | 61.18                     |                       |              |
|                           | 1743.60              | 721.33               | 1022.27               | 58.63                     |                       |              |
| 2.0 mg L <sup>-1</sup>    | 2902.76              | 724.53               | 2178.23               | 75.04                     | 75.53                 | 0.013286     |
|                           | 2919.35              | 744.14               | 2175.21               | 74.51                     |                       |              |
|                           | 2959.90              | 679.89               | 2280.01               | 77.03                     |                       |              |
| 4.0 mg L <sup>-1</sup>    | 5310.99              | 695.21               | 4615.78               | 86.91                     | 88.00                 | 0.011270     |
|                           | 5325.83              | 643.36               | 4682.47               | 87.92                     |                       |              |
|                           | 5349.11              | 579.84               | 4769.27               | 89.16                     |                       |              |
| 6.0 mg L <sup>-1</sup>    | 7711.74              | 1085.04              | 6626.70               | 85.93                     | 86.72                 | 0.010489     |
|                           | 7739.21              | 1058.72              | 6680.49               | 86.32                     |                       |              |
|                           | 7792.42              | 942.10               | 6850.32               | 87.91                     |                       |              |
| 8.0 mg L <sup>-1</sup>    | 9398.21              | 1322.33              | 8075.88               | 85.93                     | 87.05                 | 0.010166     |
|                           | 9372.58              | 1188.44              | 8184.14               | 87.32                     |                       |              |

|  |         |         |         |       |  |  |
|--|---------|---------|---------|-------|--|--|
|  | 9389.74 | 1135.22 | 8254.52 | 87.91 |  |  |
|--|---------|---------|---------|-------|--|--|
